# Supplementary material for: Assessing the validity of single-item life satisfaction measures: results from three large samples
Source: Springer Nature journal article supplement (doi:10.1007/s11136-014-0726-4), 2014-06-02
Supplement: MOESM1 [file 281988]

**Supplementary Materials**

**Study 1a & 1b**

**Group differences in life satisfaction.** Consistent across the two measures of life satisfaction and across the two samples, independent sample t-tests revealed no significant gender difference (in Oregon: *psingle-item* = .75, *pSWLS*= .89; in Washington: *psingle-item* > .99, *pSWLS*= .40). One-way ANOVAs showed that life satisfaction differed by marital status (in Oregon, *F*single-item(3,2247) = 54.53, *F*SWLS(3,2263) = 54.72; in Washington, *F*single-item(3,13020) = 203.00, *F*SWLS(3,13112) = 384.82). Across the two measures, the married reported the highest level of life satisfaction. Compared to the married, the widowed, the never married, and the divorced and separated reported lower life satisfaction (see Tables 1 & 2 for effect size estimates). One-way ANOVAs showed that life satisfaction differed by employment status (in Oregon, *F*single-item(5,2240) = 36.19, *F*SWLS(5,2253) = 39.95; in Washington, *F*single-item(5,13035) = 75.73, *F*SWLS(5,13129) = 285.50). In the Oregon sample, compared to homemakers who reported highest life satisfaction, the retired (*p*single-item > .99, *pSWLS* > .99), the employed (*p*single-item > .99, *pSWLS* = .36), and students (*p*single-item = .22, *pSWLS* = .89) reported similar levels of life satisfaction. The unemployed and respondents who were unable to work reported lower life satisfaction. In the Washington sample, compared to the retired who reported highest life satisfaction, homemakers (*p*single-item = .89, *pSWLS* > .99) reported similar levels of life satisfaction. The employed, the unemployed students, and respondents who were unable to work reported lower life satisfaction.

**Study 2**

**Group differences in life satisfaction.** No gender difference in life satisfaction was found. One-way ANOVAs showed that life satisfaction differed by marital status (*F*single-item(3,1308) = 11.35, *F*SWLS(3,1308) = 22.95). Both measures suggested that the married reported highest level of life satisfaction. Using the married as a reference category, the never married, the widowed, and the divorced and separated reported lower life satisfaction. Consistent across the two measures, employed respondents reported significantly higher level of life satisfaction compared to unemployed respondents.
